# Supplementary material for: Core–shell Zn2GeO4nanorods and their size-dependent photoluminescence properties
Source: Royal Society of Chemistry journal article supplement (doi:10.1039/c3nr04638a), 2013-01-01
Supplement: c3nr04638a.pdf [file c3nr04638a.pdf]

## Core/Shell Zn<sub>2</sub>GeO<sub>4</sub> Nanorods and Their Size-Dependent Photoluminescence Properties

Songping Wu<sup>a,\*</sup>, Zhuolin Wang<sup>a</sup>, Xin Ouyang<sup>a</sup>, Zhiqun Lin<sup>b,\*</sup>

- a. School of Chemistry and Chemical Engineering, South China University of Technology, Guangzhou, 510641, China.  
b. School of Materials Science and Engineering, Georgia Institute of Technology, Atlanta, Georgia 30332, United States

\*To whom correspondence should be addressed. E-mail: chwsp@scut.edu.cn. Fax & Tel: +86-20- 87112897; E-mail: zhiqun.lin@mse.gatech.edu. Tel: +1 404 385 4404.

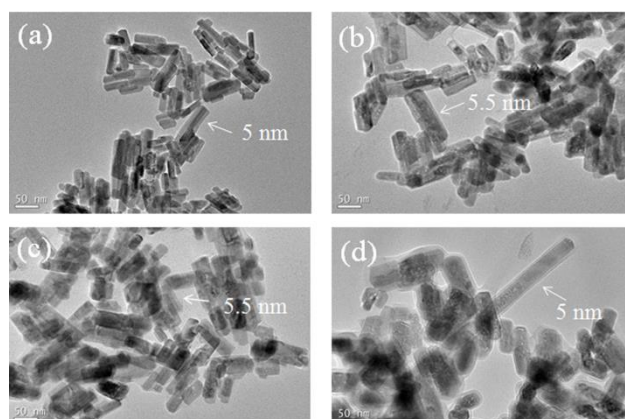

**Figure 1.** Thickness of shell for core/shell Zn<sub>2</sub>GeO<sub>4</sub> nanorods varied with different temperatures and times. (a) 180 °C, (b) 210 °C and (c) 250 °C for 1 h. (d) 250 °C for 4 h

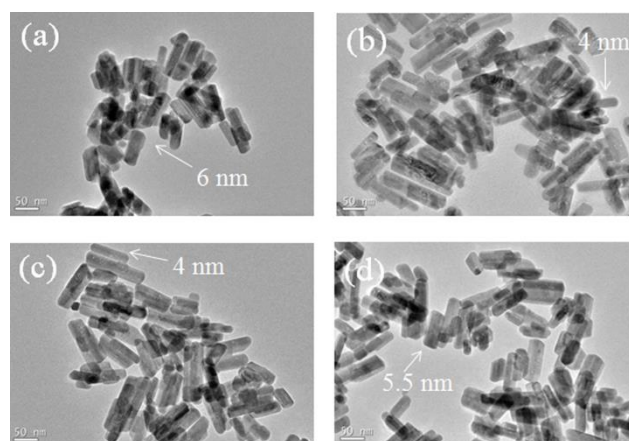

**Figure 2.** Thickness of shell for core/shell  $\text{Zn}_2\text{GeO}_4$  nanorods synthesized at  $150\text{ }^\circ\text{C}$  for 6 h varied with various weight ratios ( $\text{Wt.}_{\text{CTAB}} / \text{Wt.}_{\text{Zn}_2\text{GeO}_4}$ ): (a) 0.06, (b) 0.5, (c) 2.0, (d) 3.0.
